# Supplementary material
Source: MDPI journal article supplement (https://www.mdpi.com/2073-4344/13/2/344)
Supplement: s1 [file s1]

# Supplementary Materials

## Active sites in H-mordenite catalysts probed by NMR and FTIR

Marina G. Shelyapina<sup>1\*</sup>, Ekaterina A. Krylova<sup>1</sup>, Anton S. Mazur<sup>2</sup>, Alexey A. Tsyganenko<sup>3</sup>, Yaroslav V. Shergin<sup>3</sup>, Elizaveta A. Satikova<sup>3</sup>, and Vitalii Petranovskii<sup>4</sup>

<sup>1</sup> Department of Nuclear Physics Research Methods, Saint Petersburg State University, 7/9 Universitetskaya nab., Saint Petersburg 199034, Russia; M.G.S. marina.shelyapina@spbu.ru, E.A.K. e.a.krylova@spbu.ru

<sup>2</sup> Center for Magnetic Resonance, Saint Petersburg State University, 7/9 Universitetskaya nab., Saint Petersburg 199034, Russia; a.mazur@spbu.ru

<sup>3</sup> Department of Photonics, Saint Petersburg State University, 7/9 Universitetskaya nab., Saint Petersburg 199034, Russia; A.A.T. atsyg@yandex.ru, Ya.V.S. st054872@student.spbu.ru, E.A.S. lobzikya@gmail.com

<sup>4</sup> Centro de Nanociencias y Nanotecnología, Universidad Nacional Autónoma de México, Ensenada, Baja California, 22800 México; vitalii@ens.cnyn.unam.mx

\* Correspondence: marina.shelyapina@spbu.ru

**Table S1.** Elemental composition in mg/dm<sup>3</sup> of the studied samples determined by ICP-OES.

| Sample     | Si      | Al         | Na           |
|------------|---------|------------|--------------|
| H-MOR-9.9  | 350 ± 4 | 77.1 ± 0.2 | Not detected |
| H-MOR-15.0 | 365 ± 3 | 50.3 ± 0.2 | Not detected |
| H-MOR-15.2 | 375 ± 3 | 53.9 ± 0.2 | 3.98 ± 0.13  |
| H-MOR-15.7 | 369 ± 4 | 52.2 ± 0.2 | 3.19 ± 0.18  |
| H-MOR-15.8 | 387 ± 3 | 52.8 ± 0.2 | Not detected |
| H-MOR-18.7 | 413 ± 3 | 47.6 ± 0.2 | Not detected |
| H-MOR-19.8 | 418 ± 3 | 45.6 ± 0.2 | Not detected |

**Table S2.** Parameters of the Gaussian lines for the FTIR spectra deconvolution in Figure 10: frequency ( $\nu$ ), half width at half maximum (HWHM), and area under the curve ( $\sigma$ ).

|              | $\nu$ (cm <sup>-1</sup> ) | HWHM (cm <sup>-1</sup> ) | $\sigma$ (cm <sup>-1</sup> ) |
|--------------|---------------------------|--------------------------|------------------------------|
| Figure 10(a) | 2137.21 ± 0.07            | 5.96 ± 0.09              | 26.9 ± 0.3                   |
|              | 2159.6 ± 0.9              | 7.0 ± 0.6                | 24 ± 3                       |
|              | 2169 ± 1                  | 5 ± 2                    | 6 ± 2                        |
|              | 2177 ± 1                  | 4.3 ± 0.6                | 6 ± 2                        |
| Figure 10(b) | 2137.68 ± 0.05            | 4.82 ± 0.06              | 15.4 ± 0.2                   |
|              | 2160.0 ± 0.6              | 7.9 ± 0.5                | 13 ± 1                       |
|              | 2169.7 ± 0.4              | 3.9 ± 0.5                | 5 ± 1                        |
|              | 2177.6 ± 0.5              | 4.2 ± 0.4                | 5.8 ± 0.8                    |
| Figure 10(c) | 2138.1 ± 0.2              | 7.2 ± 0.2                | 1.32 ± 0.03                  |
|              | 2162.4 ± 0.6              | 7.5 ± 0.4                | 4.5 ± 0.4                    |
|              | 2171.0 ± 0.2              | 4.5 ± 0.3                | 2.4 ± 0.4                    |
|              | 2179.1 ± 0.1              | 3.63 ± 0.6               | 3.1 ± 0.1                    |
